# Supplementary material for: Budget Impact Analysis of Biosimilar Products in Spain in the Period 2009–2019
Source: PubMed Central journal article supplement (PMC8069914; doi:10.3390/ph14040348), 2021-04-09
Supplement: pharmaceuticals-14-00348-s001.pdf [file pharmaceuticals-14-00348-s001.pdf]

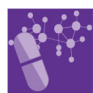

**Table S1.** Assumptions adopted for each molecule.

| Molecule <sup>1</sup> | Uptake                                                                                                              |                                                                                                                                                                                                                                                   | Price                              |                                                                                     |
|-----------------------|---------------------------------------------------------------------------------------------------------------------|---------------------------------------------------------------------------------------------------------------------------------------------------------------------------------------------------------------------------------------------------|------------------------------------|-------------------------------------------------------------------------------------|
|                       | Missing data                                                                                                        | Assumption                                                                                                                                                                                                                                        | Missing data                       | Assumption                                                                          |
| <b>SOM</b>            | Data on originator uptake between 2009 and 2015                                                                     | -Biosimilar market share between 2011 and 2015 from Almarza et al., [42].<br>- Biosimilar market share in 2009 from Rovira et al. [43].                                                                                                           | Biosimilar price prior to RPO-2014 | Biosimilar price prior to RPO-2014 is 10% greater than the RP according RPO-2014    |
| <b>FIL</b>            |                                                                                                                     | Full data available                                                                                                                                                                                                                               | Biosimilar price prior to RPO-2014 | Biosimilar price prior to RPO-2014 is 10% greater than the RP according RPO-2014    |
| <b>EPO</b>            | - Data on originator uptake between 2009 and 2015<br>- Data on epoetin zeta biosimilar uptake between 2009 and 2015 | -Biosimilar market share between 2011 and 2015 from Almarza et al., [42].<br>- Biosimilar market share in 2009 from Rovira et al. [43]<br>- The annual variation is assumed to be proportional to the total uptake of the molecule                | Biosimilar price prior to RPO-2014 | Biosimilar price prior to RPO-2014 is 10% greater than the RP according RPO-2014    |
| <b>FOL</b>            | Data on originator and biosimilar uptake between 2014 and 2016                                                      | - Biosimilar market share in 2015 extracted from Comunitat Valenciana, [44].<br>- The total volume of the molecule in 2015 is taken as the total market in 2014. Biosimilar, marketed in November 2014, is assumed to capture 20% of 2015 market. | Biosimilar price prior to RPO-2015 | Biosimilar price prior to RPO-2015 is 10% greater than the RP according RPO-2015    |
| <b>INF</b>            |                                                                                                                     | Full data available                                                                                                                                                                                                                               |                                    | Full data available                                                                 |
| <b>INS</b>            |                                                                                                                     | Full data available                                                                                                                                                                                                                               | Biosimilar price prior to RPO-2016 | Biosimilar price prior to RPO-2016 is 10% greater than the RP according to RPO-2016 |
| <b>ETA</b>            |                                                                                                                     | Full data available                                                                                                                                                                                                                               |                                    | Full data available                                                                 |
| <b>CHO</b>            |                                                                                                                     | Full data available                                                                                                                                                                                                                               | Biosimilar price prior to RPO-2017 | Biosimilar price prior to RPO-2017 is 10% greater than the RP according RPO-2017    |
| <b>RIT</b>            |                                                                                                                     | Full data available                                                                                                                                                                                                                               |                                    | Full data available                                                                 |
| <b>TRA</b>            |                                                                                                                     | Full data available                                                                                                                                                                                                                               |                                    | Full data available                                                                 |
| <b>ENO</b>            |                                                                                                                     | Full data available                                                                                                                                                                                                                               | Biosimilar price prior to RPO-2019 | Biosimilar price prior to RPO-2019 is 10% greater than the RP according RPO-2019    |
| <b>ADA</b>            |                                                                                                                     | Full data available                                                                                                                                                                                                                               |                                    | Full data available                                                                 |
| <b>PEG</b>            |                                                                                                                     | Full data available                                                                                                                                                                                                                               |                                    | Full data available                                                                 |

<sup>1</sup> SOM: somatropin; FIL: Filgrastim; EPO: epoetin; FOL: follitropin alfa; INF: infliximab; INS: insuline glargine; ETA: etancercapt; CHO: chondroitin sulfate; RIT: rituximab; TRA: trastuzumab; ENO: sodium enoxaparin; ADA: adalimumab; PEG: pegfilgrastim.
